# Supplementary material
Source: Research Square preprint supplement (doi:10.21203/rs.3.rs-9504084/v1)
Supplement: Supplementary file 1 [file 78bf34aad95bb3c0ec1efef2.xlsx]

## Sheet: Supplementary Table 3
Supplementary Table 3.Summary of radiological characteristics of the 20 cases.
Case	MRI						CT
	MRI Enhancement Pattern	Signal on T1WI	Signal on T2WI	Margin	Flow Void		Bone Destruction	CT enhancement
1	Heterogeneous Enhancement	Isointense	Hyperintense	Unclear	Yes		Osteolytic Destruction	Enhancement
2	Homogeneous Enhancement	Hypointense	Hyperintense	Clear	Yes		Osteolytic Destruction	Enhancement
3	Homogeneous Enhancement	Hypointense	Isointense	Clear	Yes		Osteolytic Destruction	Enhancement
4	Homogeneous Enhancement	Hypointense	Isointense	Clear	No		Osteolytic Destruction	Enhancement
5	Heterogeneous Enhancement	Hypointense	Hyperintense	Unclear	Yes		Osteolytic Destruction	Enhancement
6	Heterogeneous Enhancement	Hypointense	Isointense	Unclear	Yes		Osteoblastic Destruction	Enhancement
7	Heterogeneous Enhancement	Hypointense	Hyperintense	Unclear	Yes		Osteolytic Destruction	Enhancement
8	Heterogeneous Enhancement	Isointense	Hyperintense	Unclear	Yes		Osteolytic Destruction	Enhancement
9	Heterogeneous Enhancement	Isointense	Hyperintense	Unclear	Yes		Osteolytic Destruction	Enhancement
10	Homogeneous Enhancement	Hypointense	Hyperintense	Clear	Yes		Osteolytic Destruction	Enhancement
11	Homogeneous Enhancement	Isointense	Isointense	Unclear	Yes		Not Performed	Not Performed
12	Heterogeneous Enhancement	Hypointense	Hyperintense	Unclear	Yes		Osteolytic Destruction	Enhancement
13	Homogeneous Enhancement	Hypointense	Isointense	Clear	Yes		Osteoblastic Destruction	Enhancement
14	Homogeneous Enhancement	Hypointense	Isointense	Clear	Yes		Osteolytic Destruction	Enhancement
15	Not Available	Not Available	Not Available	Not Available	Not Available		Not Available	Not Available
16	Homogeneous Enhancement	Isointense	Isointense	Unclear	Yes		Osteolytic Destruction	Enhancement
17	Not Available	Not Available	Not Available	Not Available	Not Available		Not Available	Not Available
18	Heterogeneous Enhancement	Hypointense	Hyperintense	Clear	No		Osteoblastic Destruction	Enhancement
19	Heterogeneous Enhancement	Hypointense	Isointense	Unclear	Yes		Not Performed	Not Performed
20	Heterogeneous Enhancement	Hypointense	Isointense	Clear	Yes		Osteoblastic Destruction	Enhancement
