# Supplementary material
Source: Research Square preprint supplement (doi:10.21203/rs.3.rs-9504084/v1)
Supplement: Supplementary file 2 [file 8643b2438406f17d7fa25b8a.xlsx]

## Sheet: Supplementary Table 1
Case No.	Gender	Age (years)	smoking	Preoperative symptoms	Early postoperative status	Preoperative metastasis	Metastasis site	Postoperative metastasis	Tumor location	Preoperative FRANKEL grade	Preoperative KPS score	Preoperative ESCC stage	Preoperative SINS score	Preoperative ALB (g/L)	Preoperative ESR (mm/h)	Preoperative CRP (mg/L)	Preoperative D-dimer (μg/mL)	Preoperative Hb (g/L)	Preoperative embolization	Surgical protocol	Implant construct	Introperative blood loss (mL)	Involved segments	Intraoperative transfusion volume(mL)	Tumor size (cm)	postoperative day 1 hemoglobin (g/L)	Postoperative complications	KI67 index (%)	Immunotherapy	Radiotherapy	Targeted Therapy	OS time (months)	Death
1	Male	32	No	Complete paraplegia below the inguinal level.	Sensory improvement; no motor recovery documented (muscle strength remained grade 0).	Yes	Skull, Spine (multiple regions), Lung (bilateral)	/	thoracic vertebra	A	20	3	11	29.6	121	58.08	23	96	No	subtotal	Cemented screw	2200	2	2200	3	96	Documented postoperative lower-extremity edema, severe systemic infection, and pleural effusion.	5	Yes	No	Yes	8	Yes
2	Female	21	No	Sacrococcygeal pain with left lower-extremity numbness.	Pain and numbness improved.	Yes	Lung (bilateral), Sacral vertebra	/	sacral vertebrae	D	60	3	5	43	6	0.46	26	128	Yes	subtotal	Screw + Bone cement	1500	2	0	3.5	81	No	1	No	No	No	28	Yes
3	Male	42	No	Low back pain with right lower-extremity radicular pain.	Pain improved.	Yes	Lumbar vertebra	/	lumbar vertebrae	D	80	3	6	49	4	0.49	33	145	No	en-bloc	Screw + Titanium mesh	1800	1	1600	3.2	93	No	8	Yes	Yes	No	70	No
4	Male	45	No	Left lower-extremity weakness with radicular pain.	Pain improved; residual motor deficit persisted.	Yes	Lumbar vertebra, Rib, Lung (bilateral)	/	lumbar vertebrae	C	70	3	8	42.8	5	0.47	27	130	Yes	en-bloc	Screw + Titanium mesh	2400	1	1000	4	92	Documented postoperative pleural effusion.	30	Yes	Yes	No	34	No
5	Male	31	No	Complete left lower-extremity paralysis with urinary incontinence and constipation.	Postoperative neurologic deterioration of the right lower extremity.	Yes	Lumbar vertebra, Frontal lobe (left), Lung (bilateral)	/	lumbar vertebrae	B	30	3	7	48	13	4.1	32	147	Yes	subtotal	Screw + Titanium mesh	7000	4	5000	15	80	No	3	No	Yes	No	6	Yes
6	Male	43	No	Bilateral lower-extremity weakness, gait impairment	Partial improvement of left upper-extremity strength; complete paraplegia below the umbilical level persisted.	No	No metastasis	No	thoracic vertebra	C	40	2	7	37	62	17.96	35	132	No	en-bloc	Screw + Titanium mesh	3000	2	2800	17	94	No	30	No	Yes	No	5	Yes
7	Male	28	No	Lumbosacral pain with bilateral lower-extremity pain, weakness, and inability to walk.	Lower-extremity sensation and muscle strength improved (to grade 4).	Yes	Lumbar vertebra, Pubis, Temporal bone, Lung (bilateral), Liver	/	lumbar vertebrae	C	40	3	13	42	9	0.1	29	138	No	en-bloc	Screw + Titanium mesh	3200	1	3000	2	98	No	20	No	Yes	Yes	15	Yes
8	Male	30	Yes	Left upper-extremity pain and numbness.	Marked improvement in left upper-extremity symptoms.	Yes	Spine (multiple regions), Rib, Lung (bilateral), Left femur	/	cervical vertebra	D	80	3	9	42	5	3.85	26	155	No	en-bloc	Screw + Titanium mesh	1000	3	1600	4.5	143	No	15	No	Yes	No	16	Yes
9	Male	30	Yes	Complete paraplegia below the umbilical level.	Pain decreased and sensory level improved; complete paraplegia persisted.	Yes	Spine (multiple regions), Rib, Lung (bilateral), Left femur	/	thoracic vertebra	A	20	3	8	40	44	19.29	33	143	No	subtotal	Screw + Titanium mesh	3500	2	1800	5	70	No	1	No	Yes	No	9	Yes
10	Female	16	No	Left buttock and lower-extremity pain.	Pain improved.	Yes	Sacral vertebra, Ilium, Greater trochanter	/	sacral vertebrae	D	60	3	5	53	16	1.13	23	124	Yes	en-bloc	Screw + Titanium mesh	5000	3	4200	10.4	126	No	15	No	No	No	31	Yes
11	Female	16	No	Incomplete upper-extremity paresis with complete paraplegia of both lower extremities.	Sensory and motor function of both lower extremities improved.	Yes	Spine (multiple regions), Lung (bilateral)	/	cervical vertebra	B	20	3	11	37	53	38.27	30	101	No	en-bloc	Screw + Titanium mesh	1600	2	1600	3.5	95	No	8	No	No	No	24	Yes
12	Male	38	Yes	Complete paraplegia below the buttocks.	Marked neurologic improvement; muscle strength recovered to grade 2.	Yes	Spine (multiple regions), Gluteal region	/	lumbar vertebrae	C	60	2	8	44	44	3.28	28	135	No	subtotal	Screw + Bone cement	2300	4	2000	8	114	No	20	No	No	No	12	Yes
13	Male	34	No	Lumbar dorsal mass detected on examination.	Stable postoperative status.	No	Lung (bilateral)	Yes	lumbar vertebrae	E	90	0	5	43	2	2.01	35	171	No	en-bloc	Screw + Titanium mesh	800	2	0	5	140	No	3	No	Yes	Yes	67	No
14	Male	33	No	Thoracic back pain with left-hand weakness.	Symptoms improved.	No	No metastasis	No	thoracic vertebra	D	80	3	3	43.8	6	2.36	31	151	Yes	en-bloc	Screw + Artificial vertebral body	400	2	0	5	110	No	5	Yes	No	Yes	41	No
15	Male	35	No	Thoracic back pain with left upper-extremity pain.	Marked symptom improvement.	No	No metastasis	No	thoracic vertebra	D	80	1	1	42.7	5	0.5	38	152	No	subtotal	Screw	1000	2	400	5	90	No	35	Yes	No	Yes	18	No
16	Male	51	No	Lumbar lesion detected on examination.	Limited improvement documented.	Yes	Lumbar vertebra	/	Lumbar vertebrae	D	80	2	3	41.3	22	7.36	30	140	Yes	en-bloc	Screw + Artificial vertebral body	2000	1	1200	9	86	Documented dural tear with cerebrospinal fluid leakage.	5	Yes	No	Yes	59	No
17	Male	30	Yes	Right buttock pain.	Stable postoperative course.	No	No metastasis	No	sacral vertebrae	D	80	1	5	43	23	3.36	33	130	No	en-bloc	Screw + Titanium mesh	1000	3	1000	8	112	No	6	No	Yes	No	120	No
18	Male	29	No	Left upper-extremity radicular pain and numbness.	Marked symptom improvement.	No	No metastasis	No	thoracic vertebra	D	70	3	3	43.1	1	4.45	25	152	Yes	en-bloc	Screw + Artificial vertebral body	1200	1	1000	5.4	130	No	15	Yes	No	Yes	33	No
19	Male	32	No	Bilateral lower-extremity weakness.	Marked symptom improvement.	No	Lung (left)	Yes	thoracic vertebra	C	50	2	4	45	16	5.42	24	107	No	subtotal	Screw	5500	6	5200	8.5	110	No	60	No	Yes	No	11	Yes
20	Male	63	No	Incomplete left upper-extremity paresis.	Limited improvement documented.	No	No metastasis	No	cervical vertebra	D	60	1	7	43.8	4	3.29	29	139	No	subtotal	Screw	1600	4	0	9.4	89	No	8	Yes	Yes	No	56	No
