# Supplementary material
Source: Research Square preprint supplement (doi:10.21203/rs.3.rs-9504084/v1)
Supplement: Supplementary file 3 [file 9c287a72805bd86c8442bde1.xlsx]

## Sheet: Supplementary Table 2
Supplementary Table 2. Summary of immunohistochemical staining results for the 20 cases.
Case	Ki67	TFE3	CK(pan)	MyoD1	S100	Desmin	Vimentin	EMA	Syn	HMB45	CgA	Myogenin	MART-1	PAS	NSE	CD34
1	0.05	+	-	-	-	/	+	+	-	-	-	-	-	+	+	-
2	<1%	+	-	-	/	-	/	-	-	/	-	/	/	/	/	/
3	0.08	+	-	+	-	-	-	-	-	-	-	/	/	+	/	/
4	0.3	+	-	-	-	-	/	/	/	-	/	/	-	/	/	-
5	0.03	+	-	+	-	-	+	-	/	/	/	-	/	/	-	-
6	0.3	+	+	-	-	-	+	-	-	-	/	/	-	/	-	-
7	0.02	/	/	+	+	/	/	/	/	/	/	-	/	/	+	/
8	0.15	-	-	+	-	-	-	-	-	-	-	/	-	/	+	-
9	<1%	+	-	+	-	/	+	-	-	-	+	+	-	+	/	-
10	0.15	+	+	+	-	-	+	-	-	-	-	+	-	+	-	/
11	0.08	+	-	+	/	-	+	/	/	/	/	-	/	/	/	/
12	0.2	/	-	/	+	-	+	-	+	-	+	/	-	-	-	-
13	0.03	+	-	+	-	+	/	-	-	/	-	-	/	+	+	/
14	0.05	+	-	-	-	-	+	-	-	+	/	-	-	+	/	+
15	0.3	+	-	-	-	-	-	/	/	-	/	/	-	/	/	/
16	0.05	+	-	-	-	-	/	+	-	/	-	-	/	+	+	/
17	0.01	+	+	+	-	-	-	+	/	-	-	-	-	/	+	/
18	0.15	+	-	-	-	/	-	/	-	+	-	-	-	+	/	/
19	0.6	/	-	-	-	+	+	-	/	/	/	-	/	/	/	-
20	0.08	+	-	-	+	+	+	+	-	-	-	/	-	+	/	-
Total Number		17	19	19	18	16	15	15	13	13	12	12	12	10	10	10
Positive Number		16	3	9	3	3	10	4	1	2	2	2	0	9	6	1
